# Supplementary material
Source: Research Square preprint supplement (doi:10.21203/rs.3.rs-8808474/v1)
Supplement: Supplementary file 1 [file 029cba35ea06d6d32779a2e5.docx]

**Table S1 Description of the global quality score(5-point scale) for evaluating the quality of the videos with RA-TKA information.**

| Scale | Description |
| --- | --- |
| 1 | Poor quality, poor flow of the site, most information missing, not at all useful for patients |
| 2 | Generally poor quality and poor flow, some information listed but many important topics missing, of very limited use to patients |
| 3 | Moderate quality, suboptimal flow, some important information is adequately discussed but others poorly discussed , somewhat useful for patients |
| 4 | Good quality and generally good flow, most of the relevant information is listed, but some topics not covered, useful for patients |
| 5 | Excellent quality and excellent flow, very useful for patients |

**Table S2 Description of the DISCERN instrument for evaluating the reliability of the videos with RA-TKA information.**

| DISCERN | Description |
| --- | --- |
| Question 1 | Are the aims clear? |
| Question 2 | Does it achieve its aims? |
| Question 3 | Is it relevant? |
| Question 4 | Is it clear what sources of information were used to compile the publication (other than the author or producer)? |
| Question 5 | Is it clear when the information used or reported in the publication was produced? |
| Question 6 | Is it balanced and unbiased? |
| Question 7 | Does it provide details of additional sources of support and information? |
| Question 8 | Does it refer to areas of uncertainty? |

**Table S3 The 5-level scores of global quality score and DISCERN.**

| Scale, score | Level |
| --- | --- |
| Global quality score |  |
| 1 | Very poor |
| 2 | Poor |
| 3 | Fair |
| 4 | Good |
| 5 | Excellent |
| DISCERN |  |
| 1 | Unreliable |
| 2-3 | Less reliable |
| 4-5 | Fairly reliable |
| 6-7 | Relatively reliable |
| 8 | Reliable |
